# Supplementary material for: Chemoselective hydroboration of alkynes vs. alkenes over gold catalysts
Source: Royal Society of Chemistry journal article supplement (doi:10.1039/b901953g), 2009-01-01
Supplement: b901953g.pdf [file b901953g.pdf]

## **Gold (I) and Gold (III) compounds as selective catalysts for hydroboration of alkynes vs. alkenes.**

**Antonio Leyva,<sup>a</sup> Xin Zhang<sup>a</sup> and Avelino Corma.<sup>\*a</sup>**

<sup>a</sup> Instituto de Tecnología Química, UPV-CSIC, Universidad Politécnica de Valencia, Avda. de los Naranjos s/n, 46022, Valencia, Spain. E-mail: [acorma@itq.upv.es](mailto:acorma@itq.upv.es); Fax: +34 9638 77809; Tel: +34 9638 77800

### **Supporting Information**

Table of Contents:

- Experimental section:
  - o General..... S2
  - o Syntheses of AuCl<sub>3</sub>PPh<sub>3</sub> and Substrates...S2
  - o References..... S4
  - o Experimental procedures:
    - Kinetics .....S5
    - Studies about the mechanism.....S5
- Figures S1-S3.....S7
- Tables S1-S3.....S10

## Experimental Section.

### General.

Phenylacetylene, styrene, 2-methyl-but-1-en-3-yne **16**, AuClPPh<sub>3</sub> and catecholborane were obtained from Aldrich Co. Phenylethynylstyrene **19** was synthesised according to a reported procedure.<sup>1</sup> The rest of reagents and solvents were obtained from commercial sources and used without further purification otherwise specified. <sup>1</sup>H, <sup>13</sup>C, DEPT and <sup>31</sup>P-NMR were recorded in a 300 MHz instrument using the corresponding deuterated solvent containing TMS as internal standard. Gas chromatographic analyses were performed in an instrument equipped with a 25 m capillary column of 5% phenylmethylsilicone. GC/MS analyses were performed on a spectrometer equipped with the same column as the GC and operated under the same conditions. IR spectra were recorded on a spectrophotometer by impregnating the windows with the neat compound and analysing. Accurate masses were obtained by ESI technique.

### Syntheses of AuCl<sub>3</sub>PPh<sub>3</sub> and Substrates.

**AuCl<sub>3</sub>PPh<sub>3</sub>**.<sup>2</sup> Chlorine gas, generated *in situ* by addition of HCl (conc., 124 ml) over KMnO<sub>4</sub> (20 g),<sup>3</sup> was slowly bubbled through a CHCl<sub>3</sub> (10 ml) solution containing 124 mg (0.25 mmol) of AuClPPh<sub>3</sub> under magnetical stirring. The originally colourless solution turned bright yellow. This solution was filtered, concentrated by rotary evaporation, *n*-hexanes was slowly added and the mixture was cooled to 0 °C. The precipitate was isolated by filtration, washed with anhydrous diethyl ether, and vacuum dried to yield 119 mg (84 %) of a bright yellow solid, pure compound as assessed by NMR. <sup>1</sup>H NMR δ: 7.75 (9H, m), 7.55 (6H, m). <sup>13</sup>C NMR δ: 135.1, 133.8, 129.2, 123.7, 122.8. <sup>31</sup>P NMR δ: 44.0.

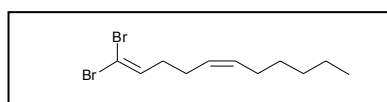

**1,1-Dibromo-undeca-1,5-diene.** Zn dust (1.96 g, 30 mmol) was added to a solution of triphenylphosphine (7.87 g, 30 mmol) in CH<sub>2</sub>Cl<sub>2</sub> (100 ml) and the mixture was cooled to 0 °C. Carbon tetrabromide (9.95 g, 30 mmol) was added and the green mixture was stirred for 15 min. The ice-bath was removed and, after stirring for another 15 min, a solution of 4-decenal (1.82 ml, 10 mmol) in CH<sub>2</sub>Cl<sub>2</sub> (40 ml) was added. The mixture was stirred for 2 h. After this time, *n*-hexanes (120 ml) was added whereupon a precipitate was formed. The mixture was filtered and the filtrate was washed with *n*-hexanes (120 ml). The solvent was removed *in vacuo* and the resulting crude was redissolved in *n*-hexanes (120 ml) and placed in the fridge for 3h. After this time, the mixture was filtered once more and the solvent removed *in vacuo* to yield the pure compound as a yellow solid (3.1 g, quantitative). IR (neat, cm<sup>-1</sup>): 3008, 2923, 2854, 1620, 1450, 810, 771, 671. <sup>1</sup>H NMR δ: 6.35 (1H, t), 5.35 (2H, m), 2.15 (4H, m), 2.0 (2H, m), 1.2 (6H, m), 0.85 (3H, t). <sup>13</sup>C NMR δ: 138.2, 132.0, 127.5, 88.9, 33.1, 31.6, 29.3, 27.2, 25.4, 22.7, 14.1. HRMS (ESI) *m/z* 307.9771 [(M+Na)<sup>+</sup>; calculated for C<sub>11</sub>H<sub>18</sub>Br<sub>2</sub>: 307,9775]; major peaks: 229.0596, 198.8591, 149.1352, 69.0683.

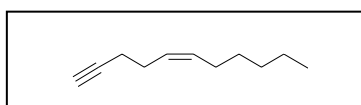

**Undec-5-en-1-yne (17).** *n*-BuLi (15.6 ml, 25.0 mmol, 1.6 M in hexanes) was added dropwise over 15 min to a solution of 1,1-dibromo-undeca-1,5-diene (3.1 g, 10.0 mmol) in THF (100 ml) at -78 °C. The solution was allowed to return to r.t. over 30 min, after which NH<sub>4</sub>Cl (aq.) (60 ml) was added and the aqueous layer was extracted with ether (2 x 100 ml). The organic fractions were combined and washed with water (2 x 80 ml) and brine (80 ml), then dried over MgSO<sub>4</sub>, filtered and concentrated *in vacuo*. The resulting crude was purified by flash column chromatography (*n*-hexanes) to give **17** as a pale yellow oil (900 mg, 6 mmol, 60 %). R<sub>f</sub> (*n*-hexanes): 0.55. IR (neat, cm<sup>-1</sup>): 3309, 3008, 2924, 2862, 2121, 1458, 1250, 717, 632. <sup>1</sup>H NMR δ: 5.45 (2H, m), 2.25 (4H, m), 2.05 (2H, m), 1.95 (1H, t), 1.3 (6H, m), 0.85 (3H, t). <sup>13</sup>C NMR δ: 132.7, 127.3, 84.2, 68.2, 31.5, 29.3, 27.3, 26.4, 22.4, 18.8, 14.0. HRMS (ESI) *m/z* 150.1411 [(M+Na)<sup>+</sup>; calculated for C<sub>11</sub>H<sub>18</sub>: 150,1409]; major peaks: 149.1377, 91.0620, 69.0741, 55.0599.

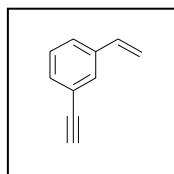

**1-Ethynyl-3-vinylbenzene (18).** Following Bestmann and co-workers' procedure,<sup>4</sup> a solution of dimethyl-1-diazo-2-oxopropylphosphonate (540 mg, 2.9 mmol) in dry methanol (12 ml) was added over a magnetically stirred dispersion of 3-ethynylbenzaldehyde (305  $\mu$ l, 2.4 mmol) and  $K_2CO_3$  (662 mg, 4.8 mmol) in dry methanol (24 ml) under nitrogen atmosphere. The stirring was continued for 4 h, observing that the inorganic base was dissolved. After this time, the solution was extracted with ether (35 ml, 4 times) and the combined organic fractions washed with brine (50 ml), then dried over  $MgSO_4$ , filtered and concentrated *in vacuo*. The resulting crude was purified by flash column chromatography (pentane) to give **18** as a colorless liquid (186 mg, 1.45 mmol, 61 %).  $R_f$  (*n*-hexanes): 0.56. IR (neat,  $cm^{-1}$ ): 3293, 3085, 3062, 3016, 2106, 1828, 1628, 1589, 1481, 1419, 1304, 1273, 1242, 987, 910, 802, 710, 656, 625.  $^1H$  NMR  $\delta$ : 7.46 (1H, t), 7.30 (2H, m), 7.17 (1H, m), 6.58 (1H, dd), 5.67 (1H, d), 5.20 (1H, d), 2.99 (1H, s).  $^{13}C$  NMR  $\delta$ : 137.8, 136.0, 131.4, 130.0, 128.5, 126.6, 122.5, 114.8, 83.5, 77.1. HRMS (ESI)  $m/z$  128.0630 [ $(M+Na)^+$ ]; calculated for  $C_{10}H_8$ : 128,0626]; major peaks: 128.0630, 57.0602.

1 T. Ishizone, G. Uehara, A. Hirao and S. Nakahama, *Macromolecules* 1998, **31(12)**, 3764.

2 S. Attar, J. H. Nelson, W. H. Bearden, N. W. Alcock, L. Solujic and E. B. Milosavljevic, *Polyhedron* 1991, **10(16)**, 1939.

3 *Vogel's Textbook of Practical Organic Chemistry*, Fifth ed.; 1989; pp. 424

4 S. Müller, B. Liepold, G. J. Roth and H. J. Bestmann, *Synlett* 1996, 521.

## Experimental Procedures.

### Kinetics in deuterated solvents.

The following is a typical procedure (Figure 1, curve A): AuClPh<sub>3</sub> (14.8 mg, 1.5 mol%) was placed in a previously dehydrated 10 ml round bottomed flask. The air was evacuated and the flask was backfilled with nitrogen and closed with a rubber septum. A nitrogen balloon was coupled with a needle. Subsequently, CDCl<sub>3</sub> (4 ml), phenylacetylene **1** (219  $\mu$ l, 2 mmol) and catecholborane **3** (256  $\mu$ l, 2.4 mmol) were added *via* syringe. The reaction mixture was magnetically stirred at room temperature. Periodic samples were taken and analysed by <sup>1</sup>H-NMR. For competitive experiments, the corresponding amount of styrene **2** was added after addition of **1**.

### Kinetics in solvent-free conditions.

**Hydroboration of phenylacetylene 1 (Figure 2a).** Phenylacetylene **1** (219  $\mu$ l, 2 mmol) and pinacolborane **6** (348  $\mu$ l, 2.4 mmol, 1.2 eq., **A** and **C-F**; 580  $\mu$ l, 4 mmol, 2 eq., **B**) were placed in a round-bottomed flask together with the corresponding amount of catalyst: none (**A** and **B**), AuCl (23.2 mg, 5 mol%, **C**), AuCl<sub>3</sub> (30.4 mg, 5 mol%, **D**), AuClPPh<sub>3</sub> + AgOTf (49.3 + 25.7 mg, 5 mol%, **E**), AuCl<sub>3</sub> (60.8 mg, 10 mol%, **F**). Then, the mixture was placed in a pre-heated oil bath at 70 °C under magnetical stirring. Aliquots were periodically taken and analysed by CG.

**Hydroboration of styrene 2 (Figure 2b).** Styrene **2** (229  $\mu$ l, 2 mmol) and pinacolborane **6** (348  $\mu$ l, 2.4 mmol, 1.2 eq.) were placed in a round-bottomed flask together with the corresponding amount of catalyst: none (**A**) or AuCl<sub>3</sub> (30.4 mg, 5 mol%, **B**) under nitrogen atmosphere. Then, the mixture was placed in a pre-heated oil bath at 70 °C under magnetical stirring. Aliquots were periodically taken and analysed by CG.

### Studies about the mechanism.

**NMR measurements of the reaction mixture.** AuPPh<sub>3</sub>Cl was dissolved in CD<sub>2</sub>Cl<sub>2</sub> and **1** was added. The mixture was cooled to – 40 °C and followed by <sup>1</sup>H-, <sup>31</sup>P- and <sup>11</sup>B-

NMR, leaving to reach room temperature. No new signals were observed. Then, catecholborane **3** was added and the reaction followed during one week.

**Interaction between AuPPh<sub>3</sub>Cl and catecholborane 3.** AuPPh<sub>3</sub>Cl (99 mg, 0.2 mmol) was dissolved in CD<sub>2</sub>Cl<sub>2</sub> (2 ml) under nitrogen atmosphere. Then, **3** (106  $\mu$ l, 1 mmol) was added and the reaction followed by <sup>1</sup>H- and <sup>31</sup>P-NMR.

**Control experiments for <sup>31</sup>P-NMR studies.** A) Neat PPh<sub>3</sub> (52 mg, 0.2 mmol,  $\delta$  = -4.3 ppm) and POPh<sub>3</sub> (56 mg, 0.2 mmol,  $\delta$  = 28.5 ppm) were dissolved in CD<sub>2</sub>Cl<sub>2</sub> (0.75 ml) and analysed. HCl in ether (2.0 M, 200  $\mu$ l, 1 eq.) was added and the resulting mixture analysed ( $\delta$  = -4.3 and a broad signal  $\sim$  39 ppm). B) AuCl (11.6 mg, 0.05 mmol) was dissolved in CD<sub>2</sub>Cl<sub>2</sub> (0.75 ml) and POPh<sub>3</sub> (55 mg, 0.2 mmol) was added ( $\delta$  = 29.3 from the free phosphine oxide and a small signal  $\sim$  58 ppm from, tentatively, the gold-phosphine oxide complex). C) **3** and PPh<sub>3</sub> were dissolved in CD<sub>2</sub>Cl<sub>2</sub> and analysed (no signal obtained).

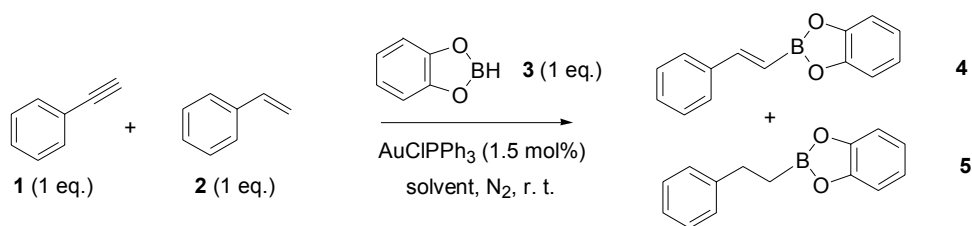

**Figure S1.** Time yield plot for the competitive hydroboration of phenylacetylene **1** (164  $\mu$ l, 1.5 mmol) and styrene **2** (172  $\mu$ l, 1.5 mmol) with catecholborane **3** (160  $\mu$ l, 1.5 mmol) in the presence of AuClPPh<sub>3</sub> (11.1 mg, 1.5 mol%) as catalyst, at room temperature under nitrogen atmosphere, using 3 ml of CDCl<sub>3</sub> as solvent (curve **A** shows the yield of **4**; curve **B** shows the yield of **5**). A similar procedure was followed when CD<sub>3</sub>CN or toluene-*d*<sup>8</sup> were used as solvents.

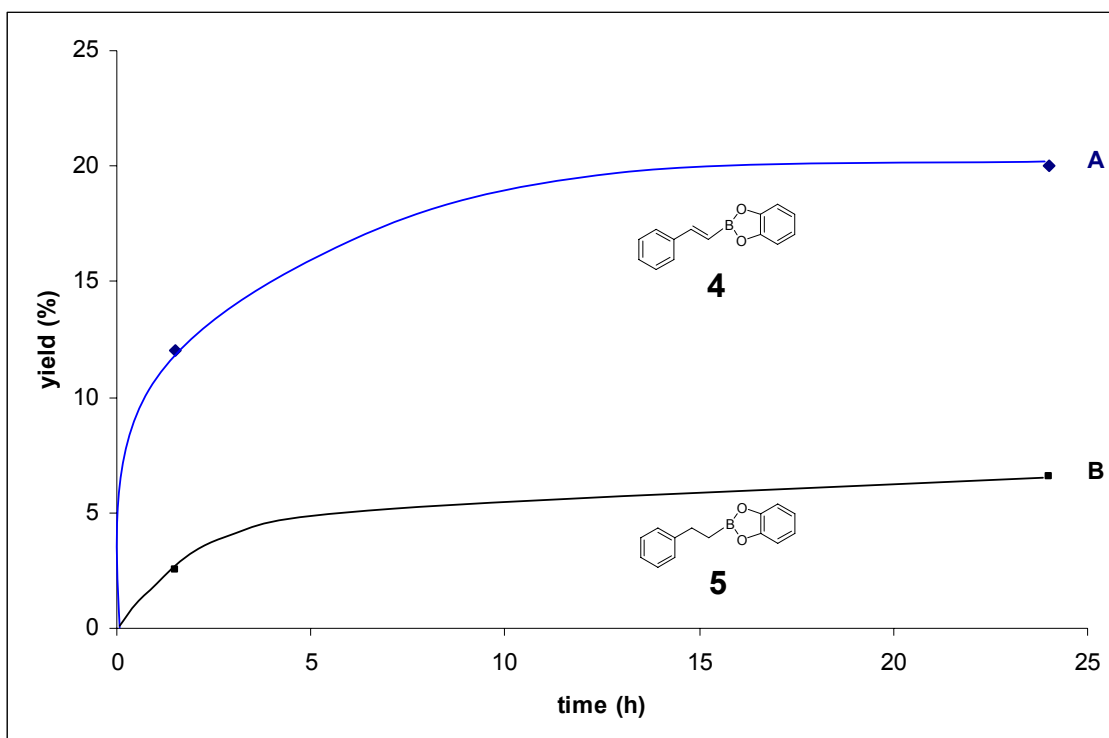

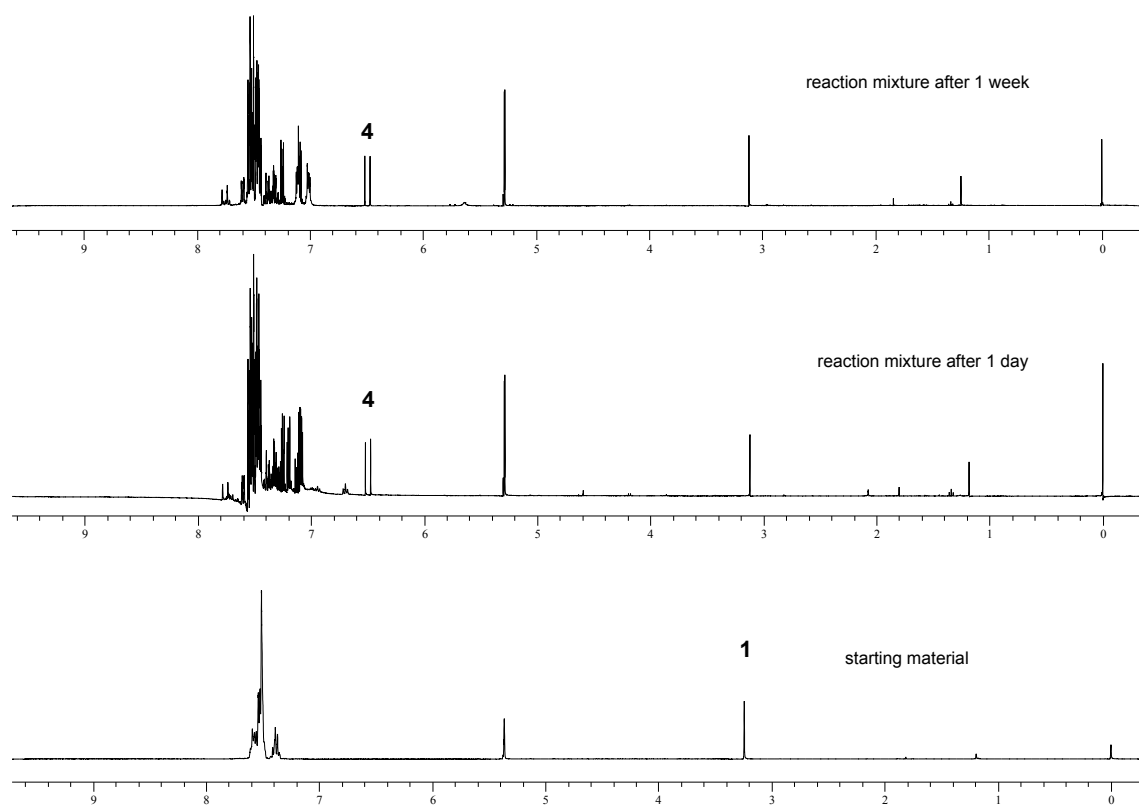

**Figure S2.** *In situ*  $^1\text{H-NMR}$  spectra for the hydroboration of phenylacetylene **1** with catecholborane **3**, using  $\text{AuClPPh}_3$  as catalyst in  $\text{CD}_2\text{Cl}_2$ . From bottom to top: reaction time = 0, 1 and 7 days.



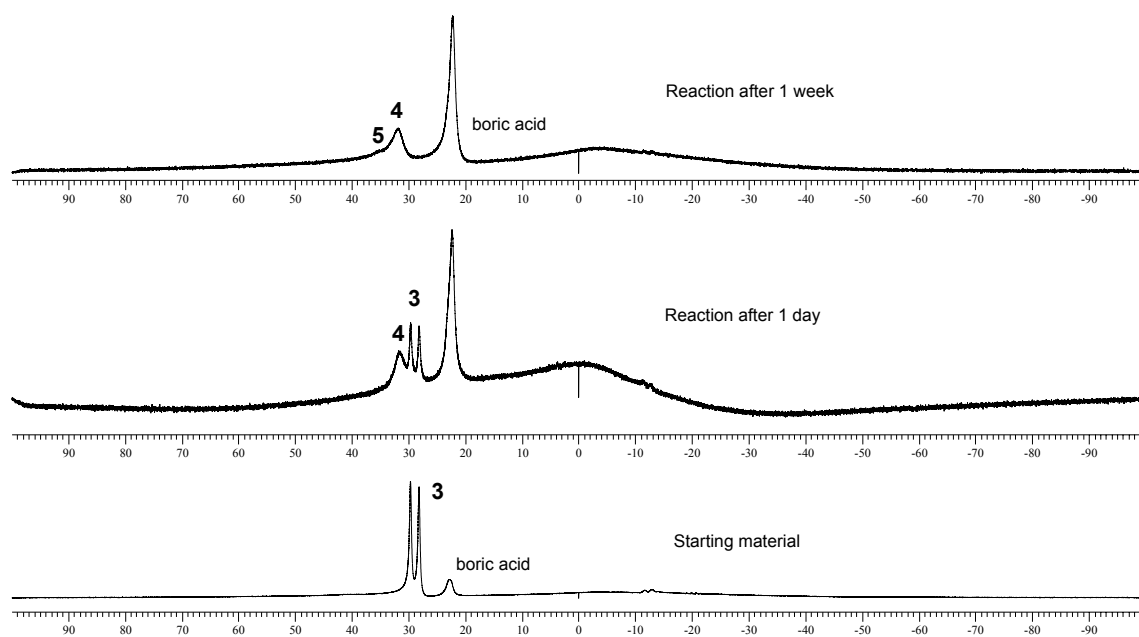

**Figure S3.** *In situ*  $^{11}\text{B}$ -NMR spectra for the hydroboration of phenylacetylene **1** with catecholborane **3**, using  $\text{AuClPPh}_3$  as catalyst in  $\text{CD}_2\text{Cl}_2$ . From bottom to top: reaction time = 0, 1 and 7 days.

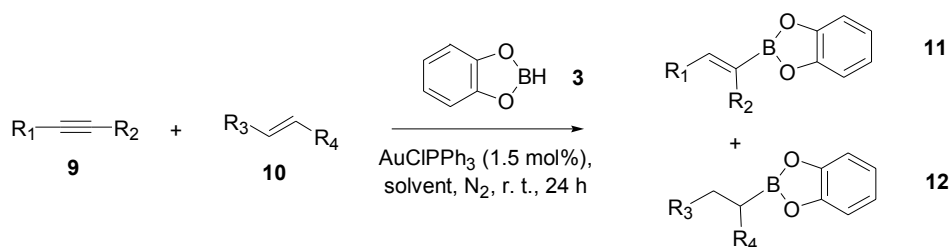

**Table S1.** Final product ratios in the competitive hydroboration of aromatic alkynes and/or alkenes (1.5 mmol) with catecholborane **3** (160  $\mu$ l, 1.5 mmol) in the presence of AuClPPh<sub>3</sub> (11.1 mg, 1.5 mol%) as catalyst, at room temperature under nitrogen atmosphere, using 3 ml of solvent (0.5 M solutions).

| Entry | Substrate                         | Solvent                        | <b>11 : 12</b>   |
|-------|-----------------------------------|--------------------------------|------------------|
| 1     | <br>$\mathbf{1} \quad \mathbf{2}$ | CDCl <sub>3</sub>              | 3.0 <sup>a</sup> |
| 2     |                                   | Toluene- <i>d</i> <sup>8</sup> | 3.0              |
| 3     |                                   | CD <sub>3</sub> CN             | 2.7              |
| 4     |                                   |                                | 1.9 <sup>b</sup> |
| 5     | <br>$\mathbf{18}$                 | CDCl <sub>3</sub>              | 8.6 <sup>c</sup> |

<sup>a</sup> No reaction with pinacolborane **6** <sup>b</sup> 3.5 eq. of catecholborane **3**

<sup>c</sup> 3 mol% of catalyst, 96 h.

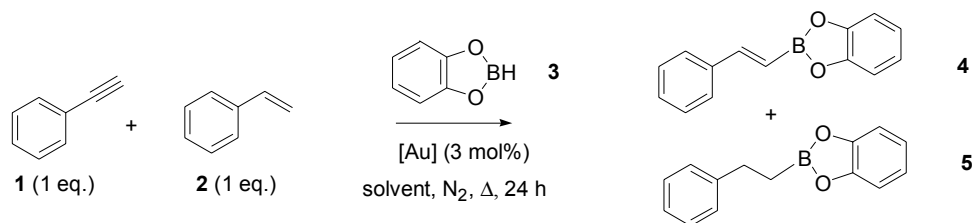

**Table S2.** Final yields obtained for the competitive hydroboration of phenylacetylene **1** (164 μl, 1.5 mmol) and styrene **2** (172 μl, 1.5 mmol) with catecholborane **3** in the presence or not of gold complexes (3 mol%) as catalysts, using 3 ml of solvent (0.5 M solutions) under nitrogen atmosphere.

| Entry | Au catalyst                        | Solvent                        | T (°C) | <b>3</b> (eq.) | <b>4</b> yield (%) <sup>a</sup> | <b>5</b> yield (%) <sup>a</sup> |
|-------|------------------------------------|--------------------------------|--------|----------------|---------------------------------|---------------------------------|
| 1     | AuCIPPh <sub>3</sub>               | CDCl <sub>3</sub>              | 25     | 3.5            | 39                              | 19 <sup>b,c</sup>               |
| 2     | AuCIPPh <sub>3</sub>               | CDCl <sub>3</sub>              | 50     | 1              | 10                              | 4 <sup>d</sup>                  |
| 3     | AuCl <sub>3</sub> PPh <sub>3</sub> |                                |        | 1              | 22                              | 8                               |
| 4     | AuCIPPh <sub>3</sub>               | CD <sub>3</sub> CN             | 25     | 1              | 12                              | 5                               |
| 5     | AuCIPPh <sub>3</sub>               |                                | 25     | 3.5            | 86                              | 46 <sup>b</sup>                 |
| 6     | AuCIPPh <sub>3</sub>               |                                | 50     | 2              | 44                              | 33                              |
| 7     | none                               |                                |        | 2              | 36                              | 26                              |
| 8     | AuCIPPh <sub>3</sub>               |                                | 80     | 1              | 40                              | 14                              |
| 9     | none                               |                                |        | 1              | 32                              | 14                              |
| 10    | AuCIPPh <sub>3</sub>               | Toluene- <i>d</i> <sup>8</sup> | 100    | 1              | [58]                            | [12]                            |
| 11    | AuCl <sub>3</sub> PPh <sub>3</sub> |                                |        | 1              | [45]                            | [9]                             |
| 12    | AuCIPPh <sub>3</sub>               | none                           | 50     | 1.5            | 77                              | 44                              |
| 13    | none                               | none                           | 50     | 1.5            | 80                              | 41                              |

<sup>a</sup> [isolated yield] <sup>b</sup> 1.5 mol % of catalyst <sup>c</sup> 48 h <sup>d</sup> No reaction with pinacolborane **6**

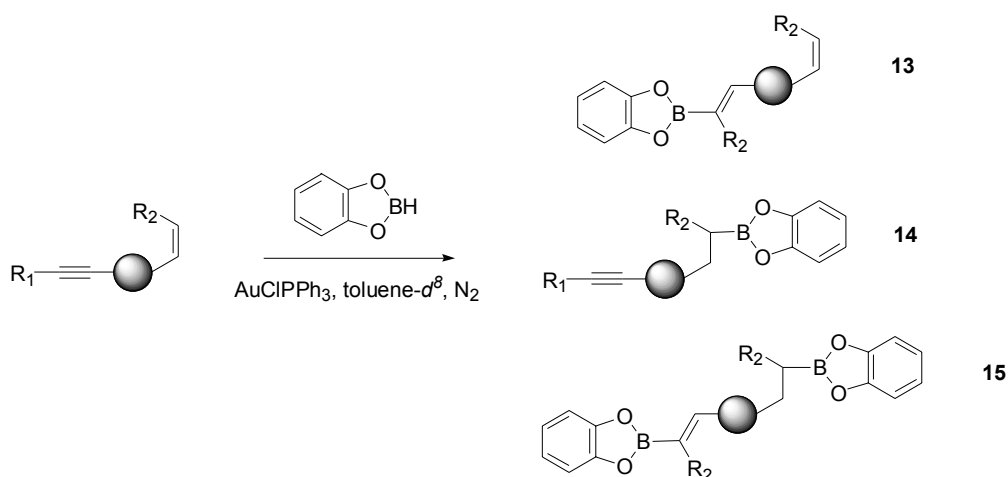

**Table S3.** Competitive hydroboration with catecholborane **3** (1 eq.) of different compounds, containing both alkynyl and alkenyl functionalities, in the presence or not of AuClPPh<sub>3</sub> as catalyst, using 3 ml of toluene-*d*<sup>8</sup> (0.5 M solutions) as solvent under nitrogen atmosphere.

| Entry | Substrate | Catalyst (mol%)           | T (°C) | Time (h) | Starting material | <b>13</b> | <b>14 + 15</b>  |
|-------|-----------|---------------------------|--------|----------|-------------------|-----------|-----------------|
| 1     | <b>16</b> | none                      | 25     | 72       | -                 | 90        | 10              |
| 2     | <b>17</b> | none                      | 25     | 72       | 30                | 70        | -               |
| 3     |           |                           | 100    | 24       | -                 | 85        | 15              |
| 4     |           | AuClPPh <sub>3</sub> (3)  | 100    | 24       | -                 | 70        | 30              |
| 5     | <b>18</b> | AuClPPh <sub>3</sub> (3)  | 25     | 96       | 83                | 15        | 2               |
| 6     |           |                           | 100    | 24       | 30                | 50        | 19              |
| 7     |           | none                      | 100    | 24       | 38                | 47        | 15              |
| 8     | <b>19</b> | AuClPPh <sub>3</sub> (3)  | 60     | 24       | 60                | 10        | 30              |
| 9     |           |                           | 100    | 24       | 40                | 20        | 40              |
| 10    |           |                           | 100    | 24       | 10                | 35        | 55 <sup>a</sup> |
| 11    |           | AuClPPh <sub>3</sub> (10) | 80     | 24       | 10                | 45        | 45 <sup>a</sup> |
| 12    |           |                           | 100    | 24       | <5                | 40        | 55 <sup>a</sup> |

<sup>a</sup> 2 eq. of **3**.
